# Supplementary material for: Quantifying factors that affect polygenic risk score performance across diverse ancestries and age groups for body mass index
Source: PubMed Central journal article supplement (PMC10018532), 2023

S Table 1. Effect of GWAS sample size on PRS performance. Difference in  $R^2$  for different groupings of individuals between the UKBB GWAS down-sampled to that of the sample size used in GIANT (N=226,960), and the full UKBB European sample size (N=377,921). Test African ancestry individuals and 5,000 random European ancestry UKBB individuals were used as LD panels for all African and European ancestry test sets, respectively.

| Age group | Ancestry | N     | PRS $R^2$<br>UKBB<br>Down-<br>sampled<br>sample size | PRS $R^2$<br>UKBB<br>Full sample<br>size | P-value                  |
|-----------|----------|-------|------------------------------------------------------|------------------------------------------|--------------------------|
| Adults    | European | 55418 | 0.0582                                               | 0.0734                                   | $<4.94 \times 10^{-324}$ |
| Teenagers |          | 3114  | 0.0588                                               | 0.0667                                   | $3.75 \times 10^{-9}$    |
| Children  |          | 5943  | 0.0274                                               | 0.0347                                   | $6.51 \times 10^{-47}$   |
| Adults    | African  | 5912  | 0.0140                                               | 0.0197                                   | $1.85 \times 10^{-46}$   |
| Teenagers |          | 1606  | 0.0179                                               | 0.0274                                   | $1.37 \times 10^{-29}$   |
| Children  |          | 3668  | 0.00612                                              | 0.00715                                  | $4.55 \times 10^{-9}$    |

S Table 2. Selected Phecodes in eMERGE which were tested for their association to the PRS<sub>BMI</sub>.

| Phecode | Description                | Cases/Controls (Adults) |           |
|---------|----------------------------|-------------------------|-----------|
|         |                            | EUR                     | AFR       |
| 401.1   | Essential hypertension     | 38181/17166             | 4317/1588 |
| 272.1   | Hyperlipidemia             | 32823/22524             | 2625/3280 |
| 272.11  | Hypercholesterolemia       | 22537/32810             | 1912/3993 |
| 278.1   | Obesity (positive control) | 16348/38999             | 2282/3623 |
| 411.4   | Coronary atherosclerosis   | 18548/36799             | 1449/4456 |
| 250.2   | Type 2 diabetes            | 16342/39005             | 2525/3380 |
| 296.2   | Depression                 | 14651/40696             | 1630/4275 |
| 208     | Benign neoplasm of colon   | 16254/39093             | 1205/4700 |
| 562.1   | Diverticulosis             | 15656/39691             | 1068/4837 |
| 495     | Asthma                     | 9391/45956              | 1253/4652 |

S Figure 1. Differences in PRS  $R^2$  across different age groups (the best performing LD panel was used for each run, p-values above each bar). We consistently observed more significant differences in PRS  $R^2$  in children versus adults and teenagers. The down-sampled UKBB summary statistics were used for these comparisons.

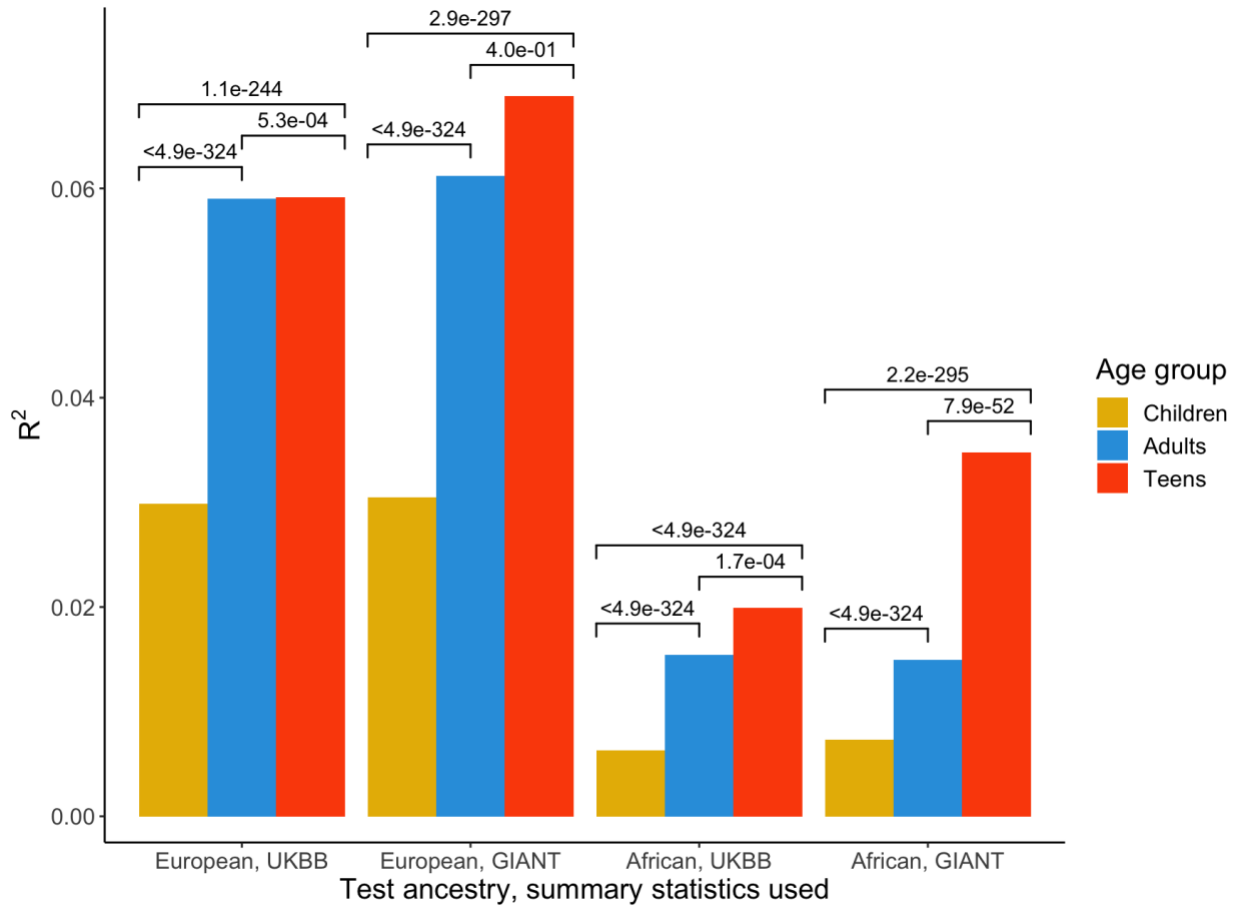

Supplement: NIHMS1853022-supplement-Supplementary-9789811270611_0040.pdf [file NIHMS1853022-supplement-Supplementary-9789811270611_0040.pdf]
